# Supplementary material for: Exploring the cost–utility of stratified primary care management for low back pain compared with current best practice within risk-defined subgroups
Source: HighWire-hosted journal article supplement (doi:10.1136/annrheumdis-2011-200731), 2012-04-05
Supplement: annrheumdis-2011-200731_ds3.pdf [file annrheumdis-2011-200731_ds3.pdf]

**Table S1: Details of the unit costs assigned to health care resource use data and periods of work absence collected at 12-month follow-up<sup>a</sup>**

| Health care resource                                               | Unit Cost (£) | Unit Cost Source                                  |
|--------------------------------------------------------------------|---------------|---------------------------------------------------|
| Study back pain clinic and physiotherapy:                          |               |                                                   |
| Initial clinic session (30 minutes)                                | 21.50         | Reference 23: Section 7.1                         |
| First post-clinic session: high-risk 'intervention' group (1 hour) | 43.00         | Reference 23: Section 7.1                         |
| First post-clinic session: all other patients (45 minutes)         | 32.25         | Reference 23: Section 7.1                         |
| Follow-up sessions: high-risk 'intervention' group (45 minutes)    | 32.25         | Reference 23: Section 7.1                         |
| Follow-up sessions: all other patients (30 minutes)                | 21.50         | Reference 23: Section 7.1                         |
| Primary care contacts:                                             |               |                                                   |
| General Practitioner: surgery consultation                         | 31.00         | Reference 23: Section 8.8(b)                      |
| General Practitioner: home visit                                   | 105.00        | Reference 23: Section 8.8(b)                      |
| Practice Nurse: surgery consultation                               | 11.00         | Reference 23: Section 8.6                         |
| Practice Nurse: home visit                                         | 20.00         | Reference 23: Section 8.6                         |
| 'Other' health care professional: surgery consultation             | 16.00         | Reference 23: Section 8.7                         |
| Hospital-based care                                                |               |                                                   |
| Consultant: back pain first attendance                             | 124.00        | Reference 24: Trauma & Orthopaedics               |
| Consultant: back pain follow-up                                    | 103.00        | Reference 24: Pain Management                     |
| Consultant: 'other' first attendance                               | 190.00        | Reference 24: General Medicine                    |
| Consultant: 'other' follow-up                                      | 130.00        | Reference 24: General Medicine                    |
| Diagnostic tests: x-ray                                            | 31.99         | Reference 25 <sup>c</sup>                         |
| Diagnostic tests: CT scan                                          | 100.00        | Reference 24: currency code RA08Z                 |
| Diagnostic tests: MRI scan                                         | 179.00        | Reference 24: currency code RA01Z                 |
| Diagnostic tests: blood test                                       | 17.28         | Reference 26 <sup>c</sup>                         |
| Epidural injections                                                | 204.57        | Reference 27: speciality code OPEPI1 <sup>c</sup> |
| Other health care professionals: <sup>b</sup>                      |               |                                                   |
| First consultation                                                 | 38.00         | Reference 24: Adult Physiotherapy                 |
| Follow-up consultation                                             | 27.00         | Reference 24: Adult Physiotherapy                 |

|                          |                        |                       |
|--------------------------|------------------------|-----------------------|
| Out-of-pocket treatments | Patient reported costs | <i>Not applicable</i> |
| Prescribed medication    | Patient-specific       | <i>Not applicable</i> |
| Periods of work absence  | Patient-specific       | <i>Not applicable</i> |

---

- <sup>a</sup> Study back pain clinic consultations were the exception; these were identified from an audit of physiotherapy service databases. Unit costs are per visit/test unless otherwise stated. In the base-case analysis, private care was costed as the NHS equivalent. No back pain-related inpatient stays were reported in the 12-month postal questionnaires.
- <sup>b</sup> Hospital-based or private practice, e.g. physiotherapy, acupuncture, osteopathy etc.
- <sup>c</sup> Unit cost estimates prior to 2008/09 were inflated using the Health Service Cost Index.<sup>23</sup>
