# Supplementary material for: Exploring the cost–utility of stratified primary care management for low back pain compared with current best practice within risk-defined subgroups
Source: HighWire-hosted journal article supplement (doi:10.1136/annrheumdis-2011-200731), 2012-04-05
Supplement: annrheumdis-2011-200731_ds5.pdf [file annrheumdis-2011-200731_ds5.pdf]

**Table S3: Cost estimates associated with the sensitivity analyses performed in the cost-utility analysis of stratified care compared with current best practice for low back pain. Values are mean (sd) costs unless stated otherwise.**

| Sensitivity analysis                                                 | Intervention                   | Control group   |
|----------------------------------------------------------------------|--------------------------------|-----------------|
| <b>NHS back pain-related health care resource use</b>                |                                |                 |
| Total health care cost: low risk group (n = 221)                     | 72.22 (157.0)                  | 143.87 (216.5)  |
| Mean difference (95% CI; p-value) <sup>a</sup>                       | -71.65 (-122.1 to -21.2; 0.01) |                 |
| Total health care cost: medium risk group (n = 394)                  | 207.38 (295.0)                 | 250.28 (325.1)  |
| Mean difference (95% CI; p-value) <sup>a</sup>                       | -42.90 (-93.8 to 8.04; 0.10)   |                 |
| Total health care cost: high risk group (n = 236)                    | 343.83 (370.5)                 | 309.19 (443.4)  |
| Mean difference (95% CI; p-value) <sup>a</sup>                       | 34.64 (-59.9 to 129.1; 0.47)   |                 |
| <b>Incorporation of generic health care resource use<sup>b</sup></b> |                                |                 |
| Total health care cost: low risk group (n = 221)                     | 240.41 (386.6)                 | 323.00 (514.7)  |
| Mean difference (95% CI; p-value) <sup>a</sup>                       | -82.59 (-240.5 to 75.3; 0.31)  |                 |
| Total health care cost: medium risk group (n = 394)                  | 431.16 (745.0)                 | 516.22 (840.1)  |
| Mean difference (95% CI; p-value) <sup>a</sup>                       | -85.06 (-278.8 to 108.7; 0.39) |                 |
| Total health care cost: high risk group (n = 236)                    | 597.20 (499.0)                 | 524.19 (1013.1) |
| Mean difference (95% CI; p-value) <sup>a</sup>                       | 73.01 (161.2 to 307.2; 0.54)   |                 |
| <b>Complete-case analysis<sup>c</sup></b>                            |                                |                 |
| Total health care cost: low risk group (n = 115)                     | 99.92 (206.9)                  | 120.39 (130.4)  |
| Mean difference (95% CI; p-value) <sup>a</sup>                       | -20.47 (-94.8 to 53.9; 0.59)   |                 |
| Total health care cost: medium risk group (n = 220)                  | 233.91 (273.5)                 | 301.53 (329.6)  |
| Mean difference (95% CI; p-value) <sup>a</sup>                       | -67.72 (-155.0 to 19.7; 0.13)  |                 |
| Total health care cost: high risk group (n = 123)                    | 378.25 (344.2)                 | 398.13 (404.8)  |
| Mean difference (95% CI; p-value) <sup>a</sup>                       | -19.88 (-172.3 to 132.6; 0.80) |                 |
| <b>Variation in the unit cost of private health care<sup>d</sup></b> |                                |                 |
| Total health care cost: low risk group (n = 221)                     | 121.08 (327.7)                 | 186.71 (397.0)  |
| Mean difference (95% CI; p-value) <sup>a</sup>                       | -65.63 (-167.4 to 36.1; 0.21)  |                 |
| Total health care cost: medium risk group (n = 394)                  | 267.34 (417.9)                 | 331.87 (480.4)  |
| Mean difference (95% CI; p-value) <sup>a</sup>                       | -64.53 (157.5 to 28.4; 0.17)   |                 |
| Total health care cost: high risk group (n = 236)                    | 427.12 (626.5)                 | 405.96 (819.0)  |
| Mean difference (95% CI; p-value) <sup>a</sup>                       | 21.16 (-174.7 to 217.1; 0.83)  |                 |

<sup>a</sup> Difference = targeted intervention - control group. Reported confidence intervals were generated using conventional parametric methods.

<sup>b</sup> Consultations with health care professionals for other health reasons (i.e. not back pain) were collected within the 12-month questionnaire. Costs relating to these consultations are included in these mean cost estimates.

<sup>c</sup> Inclusion required valid responses to the EQ-5D at each data collection point (baseline, 4 months and 12 months) and completion of the resource use items with the 12-month questionnaire.

<sup>d</sup> Reported results correspond to an analysis performed using a price premium of 3 for the unit costs of private health care, i.e. the unit cost of private health care was assumed to be 3 times greater than the cost of the equivalent NHS resource.
